# Supplementary material
Source: PubMed Central journal article supplement (PMC3170730)

## Supporting Information

Mechanism of Inhibition of the GluA2 AMPA Receptor Channel Opening: the Consequence of Addition of an *N*-3 Methylcarbamoyl Group on the Diazepine Ring of 2,3-Benzodiazepine Derivatives<sup>†</sup>

Congzhou Wang, Zhenyu Sheng, and Li Niu\*

*Department of Chemistry, and Center for Neuroscience Research, University at Albany, SUNY,  
Albany, NY 12222, USA*

**Table S1.** Homomeric GluA2Q<sub>flip</sub> receptors desensitize in two phases (Figure 3D), i.e., a fast desensitizing phase, and a non-desensitizing phase. The amplitudes of the desensitizing and non-desensitizing phases were measured at both closed-channel (determined at 100  $\mu$ M of glutamate) and open-channel (determined at 3 mM of glutamate) states. The following list shows the ratio of the amplitude of non-desensitizing phase at 3 mM *versus* 100  $\mu$ M, collected from the same cell. The data are from a total of 8 cells.

|                | <b>Glu (mM)</b> | <b>A<sub>des</sub> (nA)</b> | <b>A<sub>non-des</sub> (nA)</b> | <b>A<sub>non-des</sub>/A<sub>des</sub></b> | <b>A<sub>non-des</sub> (3mM)/A<sub>non-des</sub> (100 <math>\mu</math>M)</b> |
|----------------|-----------------|-----------------------------|---------------------------------|--------------------------------------------|------------------------------------------------------------------------------|
| Cell 1         | 0.1             | -0.29                       | -0.045                          | 15.6%                                      | 1.30                                                                         |
|                | 3               | -3.72                       | -0.059                          | 1.6%                                       |                                                                              |
| Cell 2         | 0.1             | -0.12                       | -0.012                          | 10.1%                                      | 2.19                                                                         |
|                | 3               | -2.27                       | -0.027                          | 1.2%                                       |                                                                              |
| Cell 3         | 0.1             | -0.12                       | -0.014                          | 12.0%                                      | 1.48                                                                         |
|                | 3               | -3.38                       | -0.021                          | 0.6%                                       |                                                                              |
| Cell 4         | 0.1             | -0.17                       | -0.026                          | 15.2%                                      | 1.10                                                                         |
|                | 3               | -1.91                       | -0.029                          | 1.5%                                       |                                                                              |
| Cell 5         | 0.1             | -0.20                       | -0.012                          | 6.1%                                       | 1.56                                                                         |
|                | 3               | -2.29                       | -0.019                          | 0.8%                                       |                                                                              |
| Cell 6         | 0.1             | -0.16                       | -0.016                          | 10.1%                                      | 1.30                                                                         |
|                | 3               | -2.66                       | -0.021                          | 0.8%                                       |                                                                              |
| Cell 7         | 0.1             | -0.383                      | -0.050                          | 13.0%                                      | 1.40                                                                         |
|                | 3               | -3.88                       | -0.070                          | 1.8%                                       |                                                                              |
| Cell 8         | 0.1             | -0.40                       | -0.071                          | 17.6%                                      | 1.25                                                                         |
|                | 3               | -4.51                       | -0.088                          | 2.0%                                       |                                                                              |
| <b>Average</b> |                 |                             |                                 | 12.5%                                      | 1.45                                                                         |
|                |                 |                             |                                 | 1.3%                                       |                                                                              |

**FIGURE S1:** Chemical structures of BDZ-2 [1-(4-aminophenyl)-3,5-dihydro-7,8-methylenedioxy-4*H*-2,3-benzodiazepin-4-one] and BDZ-3 [1-(4-aminophenyl)-3-methylcarbamoyl-7,8-methylenedioxy-4*H*-2,3-benzodiazepin-4-one].

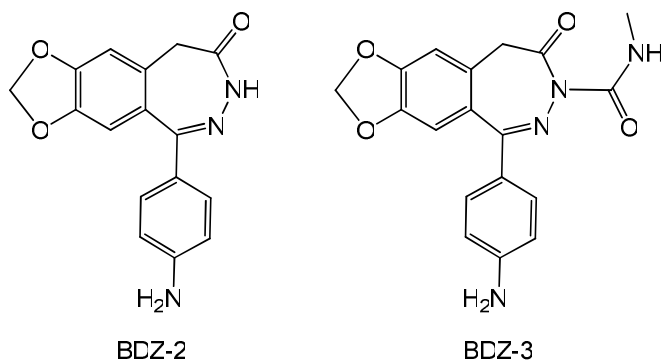

Supplement: NIHMS314806-supplement-1_si_001.pdf [file NIHMS314806-supplement-1_si_001.pdf]
